# Supplementary material
Source: PubMed Central journal article supplement (PMC5583093)
Supplement: 13197_2017_2669_MOESM1_ESM.pdf [file 13197_2017_2669_MOESM1_ESM.pdf]

## Journal of Food Science and Technology

### Hulless barley as a promising source to improve the nutritional quality of wheat products

Sneh Narwal<sup>1\*</sup>, Dinesh Kumar<sup>1</sup>, Sonia Sheoran<sup>1</sup>, RPS Verma<sup>2</sup> and RK Gupta<sup>1</sup>

<sup>1</sup> ICAR-Indian Institute of Wheat & Barley Research, Karnal-132001, India

<sup>2</sup> International Center for Agricultural Research in the Dry Areas (ICARDA)  
PO Box 6299, Rabat Instituts, Rue Hafiane Cherkaoui, Rabat, Morocco

\*Corresponding author : [snehdagar@yahoo.co.in](mailto:snehdagar@yahoo.co.in)

### Quality and Nutritional Characteristics of wheat and barley varieties used in the study

#### *Wheat Varieties*

|                          | <b>C 306</b>                                            | <b>HS 490</b>                    |
|--------------------------|---------------------------------------------------------|----------------------------------|
| Year of Release          | 1965                                                    | 2007                             |
| Growing Zone             | North Western Plains Zone/<br>North Western Plains Zone | Northern Hills Zone              |
| Growing Conditions       | Rainfed, Timely sown                                    | Restricted Irrigation, Late sown |
| Pedigree                 | RGN/CSK3//2*C591/3/C217/N14/<br>/C281                   | HS364/HPW114//HS240/HS346        |
| Av. Yield (Q/ha)         | 2.6                                                     | 3.1                              |
| Protein (%)              | 11.7                                                    | 9.1                              |
| Test Weight (Kg/hl)      | 78.2                                                    | 75.0                             |
| Hardness Index           | 89                                                      | 20                               |
| Sedimentation value (ml) | 40                                                      | 34                               |
| Chapatti score           | 8.1                                                     | -                                |
| Biscuit spread factor    | -                                                       | 11.41                            |
| Wet gluten (%)           | 30.7                                                    | 20.9                             |
| Iron (ppm)               | 47.5                                                    | 36.5                             |
| Zinc (ppm)               | 42.9                                                    | 35.2                             |

Source – Anonymous. 2015. Progress report of the All India Coordinated Wheat and Barley Improvement project 2014-15. Wheat quality, Vol. IV. (Eds. R.K. Gupta, D. Mohan, Sewa Ram, Sneh Narwal and Indu Sharma). ICAR-Indian institute of wheat and barley research, Karnal, India.

**Barley Variety (BHS 352) – Six row, huskless food barley**

|                     |                         |
|---------------------|-------------------------|
| Year of Release     | 2003                    |
| Growing Zone        | Northern Hills Zone     |
| Growing Conditions  | Rainfed, Timely sown    |
| Pedigree            | HBL 240/BHS504//VLB 129 |
| Protein (% dwb)     | 14.3                    |
| Test Weight (Kg/hl) | 68.7                    |
| β- glucan (%)       | 6.4                     |

Source - Anonymous (2014). Progress Report of All India Coordinated Wheat & Barley Improvement Project 2013-14, Vol. VI. Barley Network. Eds: A.S. Kharub, D Kumar, J Singh, V Kumar, , R Selvakumar , AKhippal, R Malik, A Verma, S Katare and InduSharma. ICAR-Indian Institute of Wheat & Barley Research, Karnal, India.
