# Supplementary material
Source: PubMed Central journal article supplement (PMC5583093)
Supplement: 13197_2017_2669_MOESM2_ESM.pdf [file 13197_2017_2669_MOESM2_ESM.pdf]

## **Journal of Food Science and Technology**

Hulless barley as a promising source to improve the nutritional quality of wheat products

Sneh Narwal<sup>1\*</sup>, Dinesh Kumar<sup>1</sup>, Sonia Sheoran<sup>1</sup>, RPS Verma<sup>2</sup> and RK Gupta<sup>1</sup>

<sup>1</sup> ICAR-Indian Institute of Wheat & Barley Research, Karnal-132001, India

<sup>2</sup> International Center for Agricultural Research in the Dry Areas (ICARDA)  
PO Box 6299, Rabat Instituts, Rue Hafiane Cherkaoui, Rabat, Morocco

\*Corresponding author : [snehdagar@yahoo.co.in](mailto:snehdagar@yahoo.co.in)

### **Parameters for evaluation of wheat for chapatti quality score**

- Water uptake
- Dough stickiness (Before maturation)
- Colour of dough (Before maturation)
- Dough stickiness (After maturation)
- Colour of dough (After maturation)
- Puffing height (cm)
- % Loss of water just after baking
- Appearance
- Colour
- Aroma
- Pliability
- Taste
- % Loss of water 4hr after baking (Open condition)
- % Loss of water 4hr after baking (Closed condition)
- Pliability 4hr after baking (Open condition)
- Pliability 4hr after baking (Closed condition)
